# Supplementary material for: Apolipoprotein (a)/Lipoprotein(a)‐Induced Oxidative‐Inflammatory α7‐nAChR/p38 MAPK/IL‐6/RhoA‐GTP Signaling Axis and M1 Macrophage Polarization Modulate Inflammation‐Associated Development of Coronary Artery Spasm
Source: Hindawi journal article supplement (doi:10.1155/2022/9964689), 2022-01-01
Supplement: f1 [file 9964689.f1.pdf]

### Supplementary Table S1. Western blot antibodies sheet.

| No. | Target          | Dilution | Catalog      |          | Kda |
|-----|-----------------|----------|--------------|----------|-----|
| 1   | $\alpha$ 7nAChR | 1:1000   | abcam        | ab216485 | 47  |
| 2   | p38             | 1:1000   | abcam        | ab31828  | 37  |
| 3   | p-pp38          | 1:1000   | abcam        | ab4822   | 37  |
| 4   | IL-6            | 1:1000   | abcam        | ab9324   | 120 |
| 5   | RhoA            | 1:1000   | cellsignal   | #2117    | 25  |
| 6   | RhoA-GTP        | 1:1000   | cellsignal   | #8820    | 25  |
| 7   | p-MBS           | 1:1000   | thermofisher | #3040    | 140 |
| 8   | t-MBS           | 1:1000   | thermofisher | #2634    | 140 |
| 9   | ROCK1           | 1:1000   | cellsignal   | #4035    | 160 |
| 10  | ROCK2           | 1:1000   | cellsignal   | #9029    | 160 |
| 11  | iNOS            | 1:1000   | abcam        | ab3523   | 131 |
| 12  | GAPDH           | 1:10000  | abcam        | ab9484   | 37  |
