# Supplementary material for: Apolipoprotein (a)/Lipoprotein(a)‐Induced Oxidative‐Inflammatory α7‐nAChR/p38 MAPK/IL‐6/RhoA‐GTP Signaling Axis and M1 Macrophage Polarization Modulate Inflammation‐Associated Development of Coronary Artery Spasm
Source: Hindawi journal article supplement (doi:10.1155/2022/9964689), 2022-01-01
Supplement: f3 [file 9964689.f3.pdf]

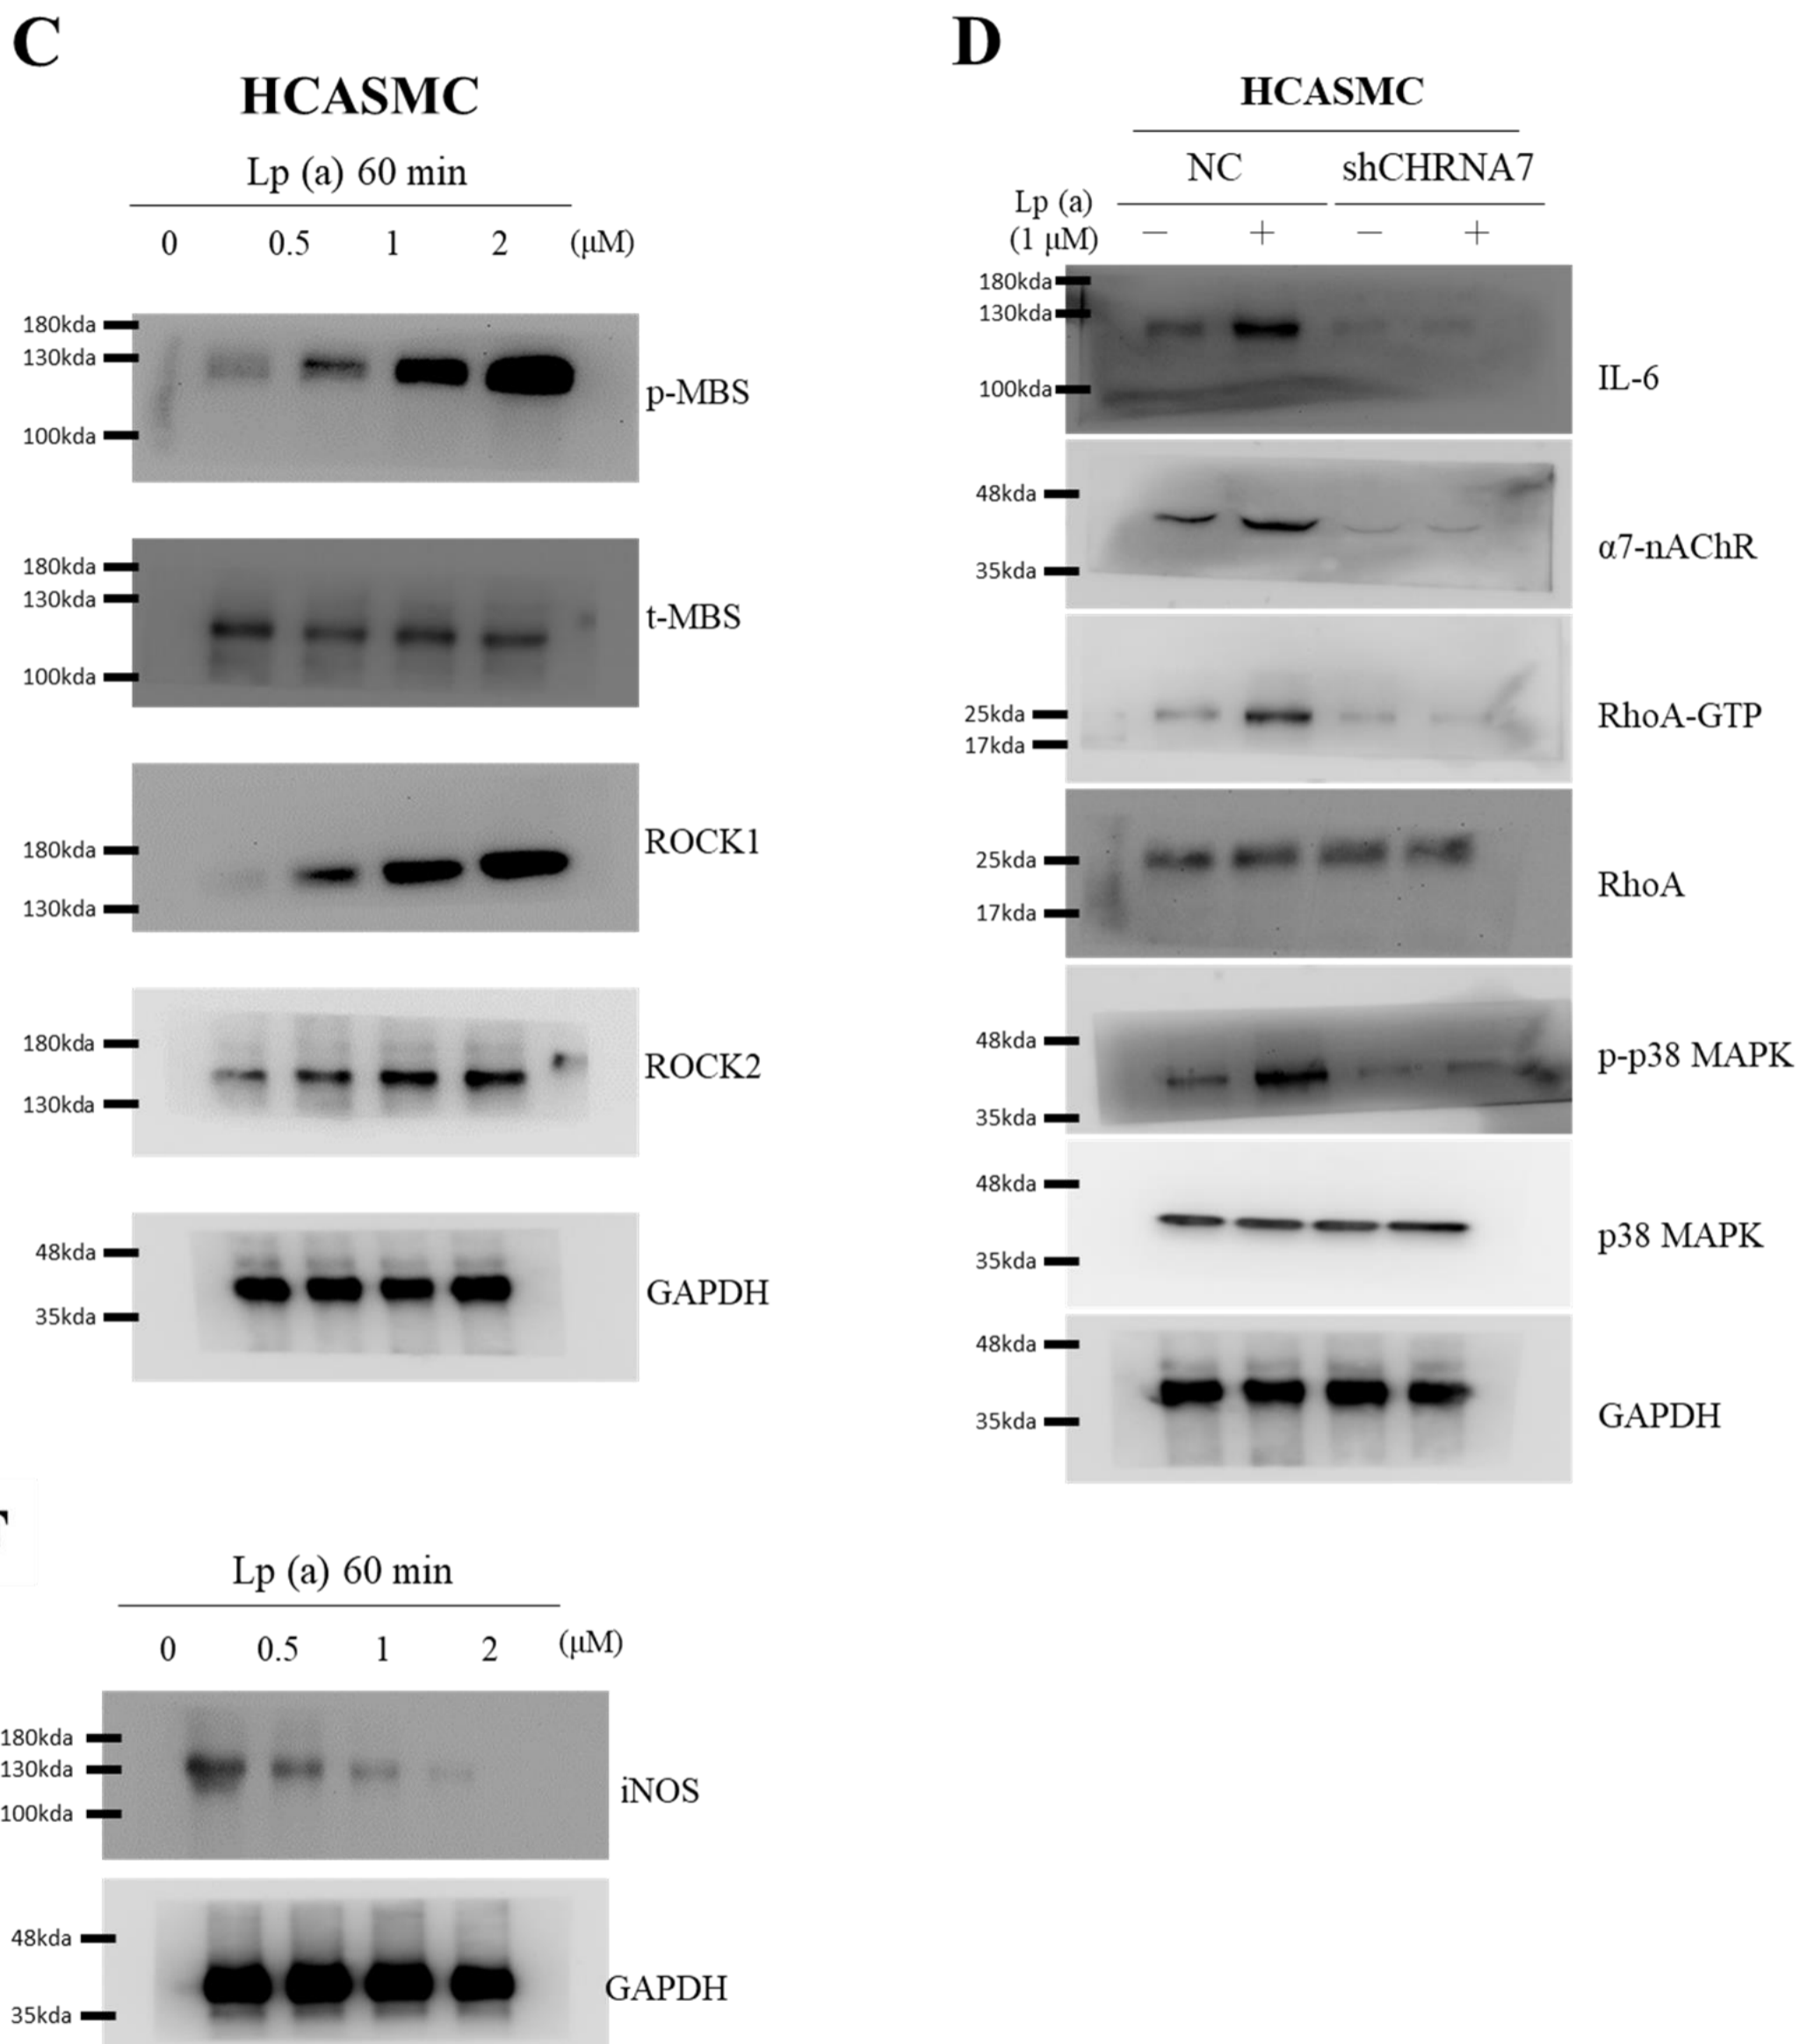

**Supplementary Figure S2. Full-size blots of Figure 2 (c), 2 (d) and 2(f).**
