# Supplementary material for: Apolipoprotein (a)/Lipoprotein(a)‐Induced Oxidative‐Inflammatory α7‐nAChR/p38 MAPK/IL‐6/RhoA‐GTP Signaling Axis and M1 Macrophage Polarization Modulate Inflammation‐Associated Development of Coronary Artery Spasm
Source: Hindawi journal article supplement (doi:10.1155/2022/9964689), 2022-01-01
Supplement: f4 [file 9964689.f4.pdf]

**C**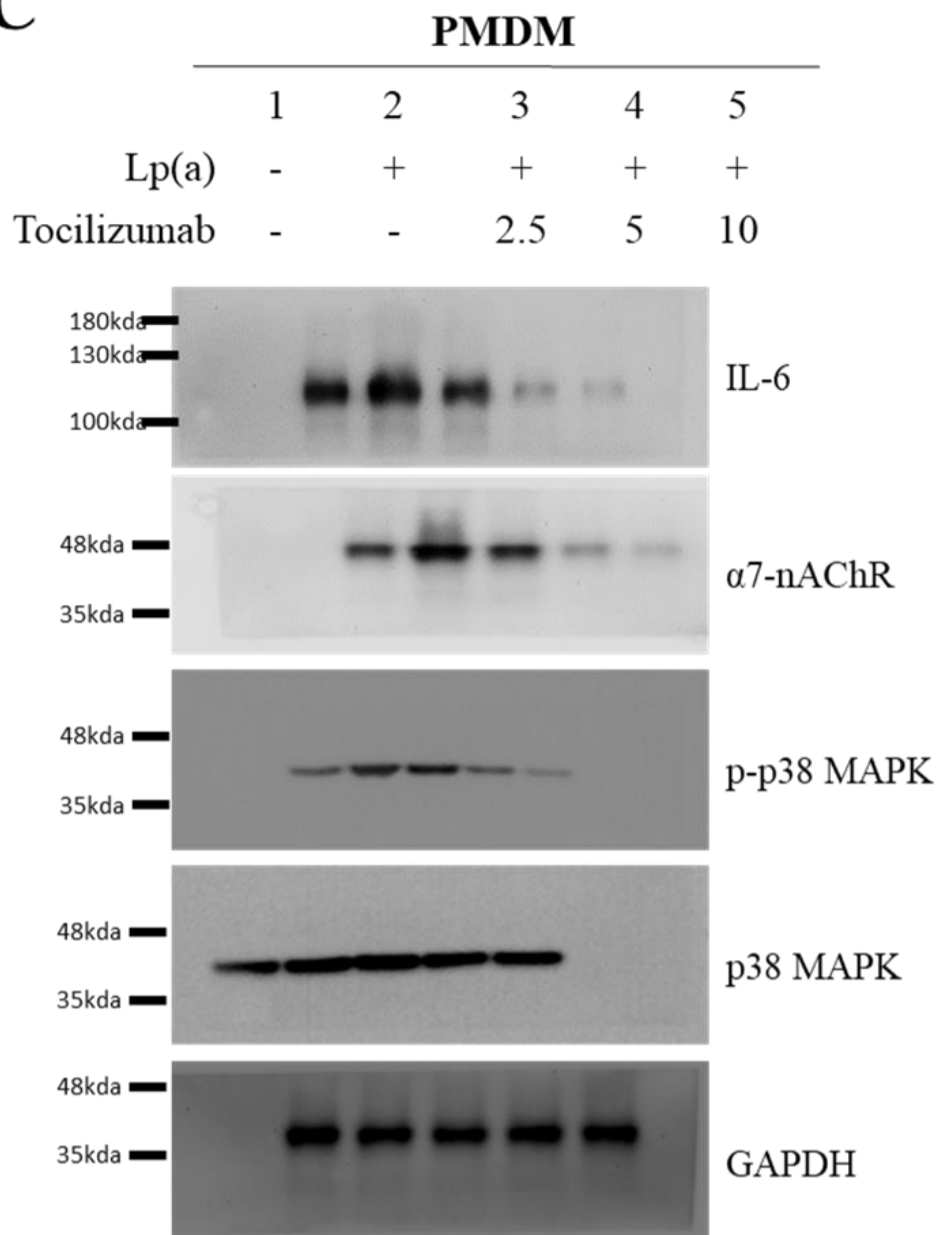**D**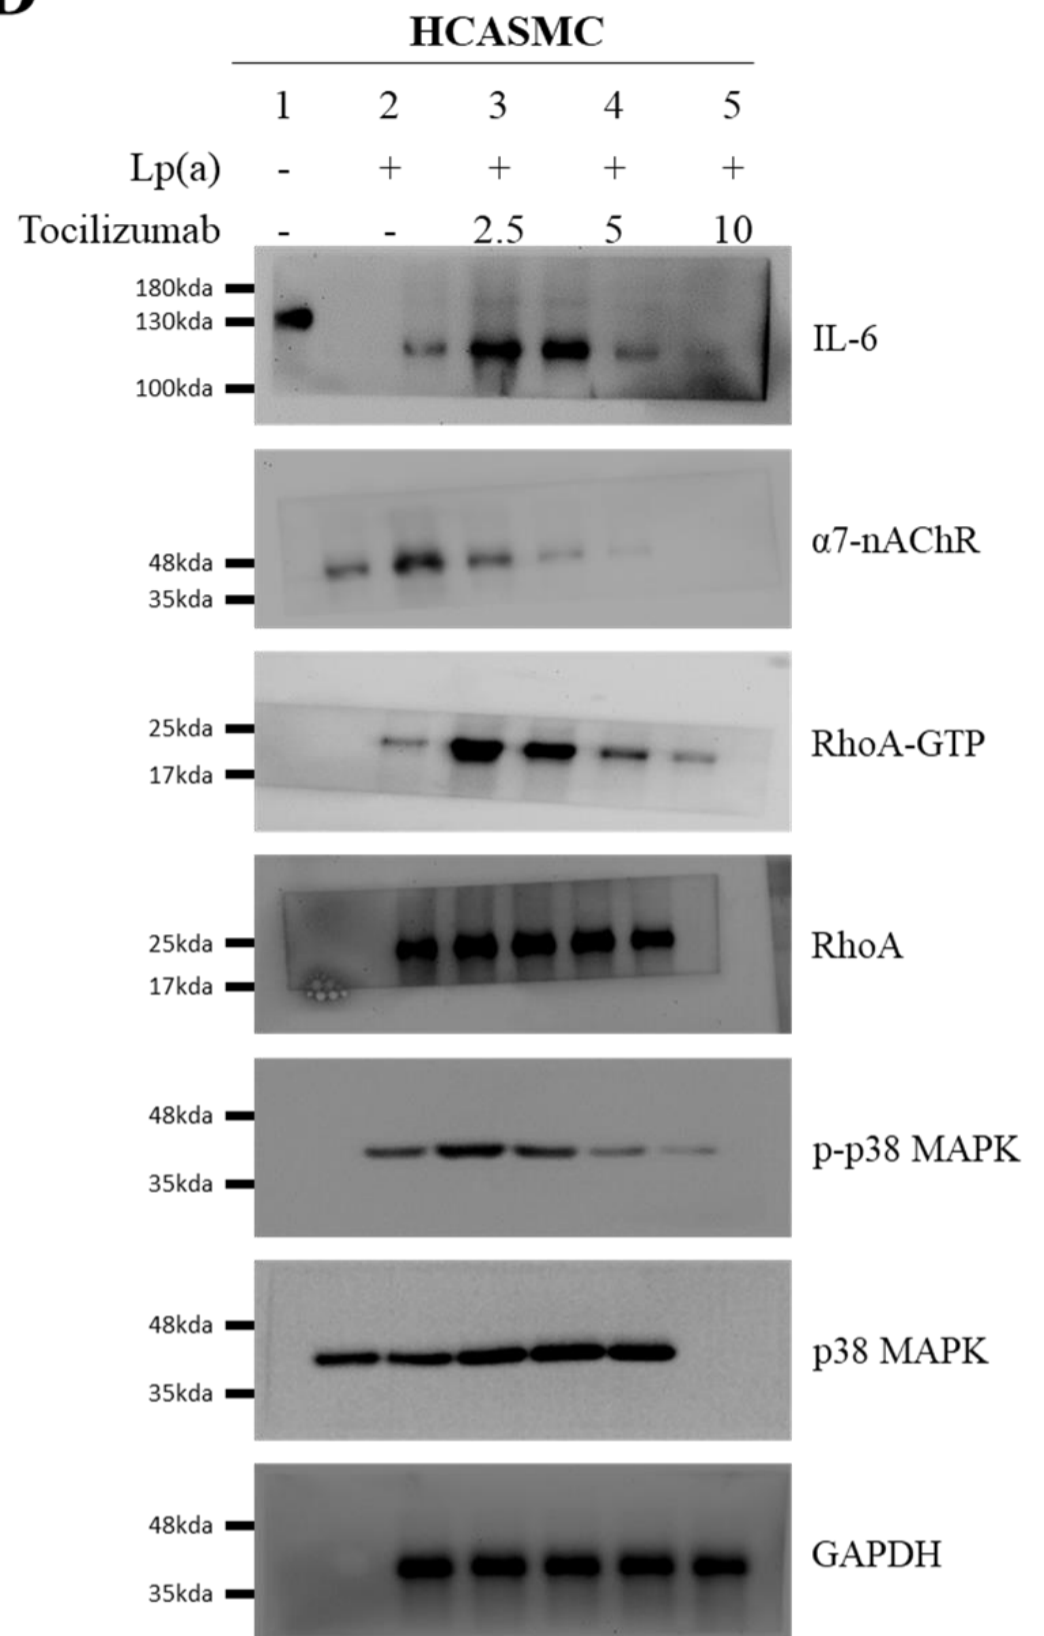

**Supplementary Figure S3. Full-size blots of Figure 4 (c) and 4 (d).**
